# Supplementary material for: Metal–organic framework MIL-101 as a low background signal platform for label-free DNA detection
Source: Royal Society of Chemistry journal article supplement (doi:10.1039/c3an01975f), 2013-12-02
Supplement: c3an01975f.pdf [file c3an01975f.pdf]

## Supplementary Information

*for*

Metal-organic framework MIL-101 as a low background signal  
platform for label-free DNA detection

Jing Mei Fang,<sup>a</sup> Fei Leng,<sup>a</sup> Xi Juan Zhao,<sup>\*b</sup> Xiao Li Hu<sup>a</sup> and Yuan Fang Li<sup>\*a</sup>

<sup>a</sup> Education Ministry Key Laboratory on Luminescence and Real-Time Analysis, College of  
Chemistry and Chemical Engineering Southwest University, Chongqing 400715, P R China;

*E-mail:* liyf@swu.edu.cn, *Fax:* (+86) 23 68367257; *Tel:* (+86) 23 68254659;

<sup>b</sup> College of Horticulture and Landscape Architecture, Southwest University, Chongqing

400716, P R China. *E-mail:* xijuazh@swu.edu.cn

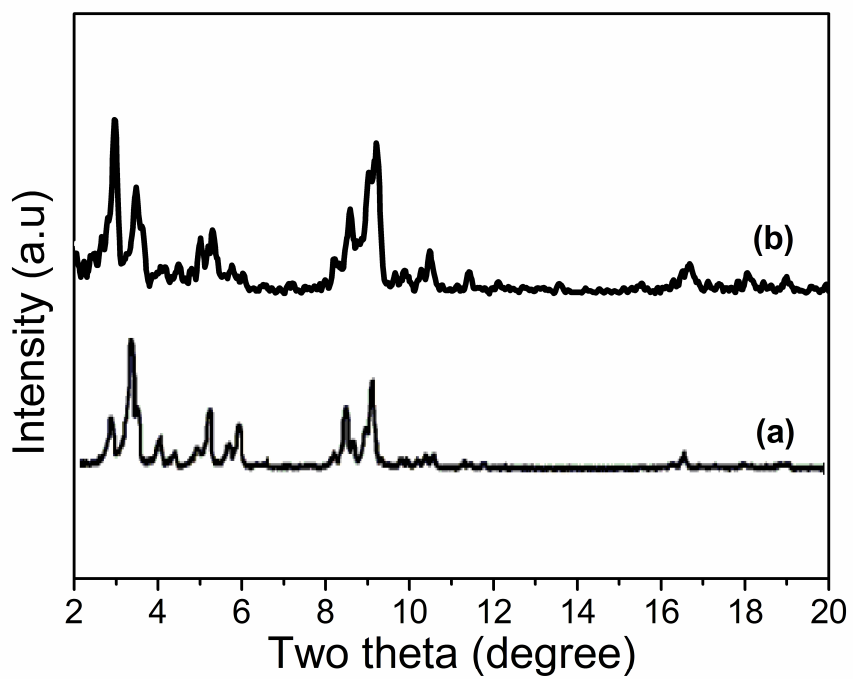

**Fig. S1** The powder XRD spectra of MIL-101: (a) simulated; (b) the as-synthesized.

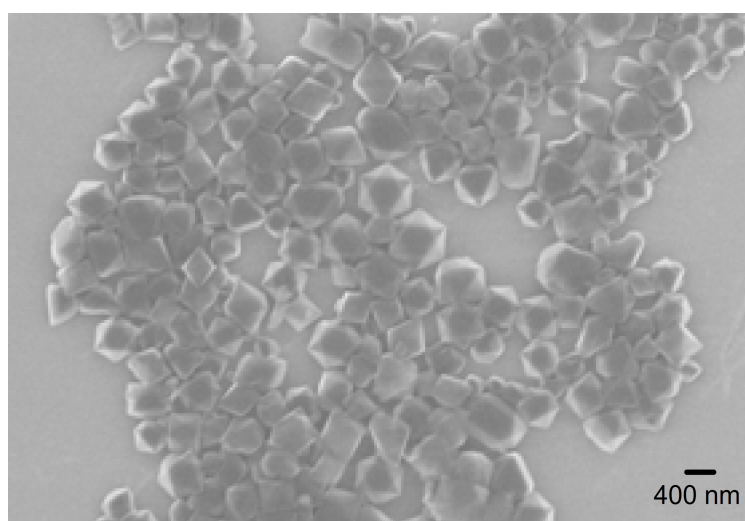

**Fig. S2** The SEM image of as-synthesized MIL-101.

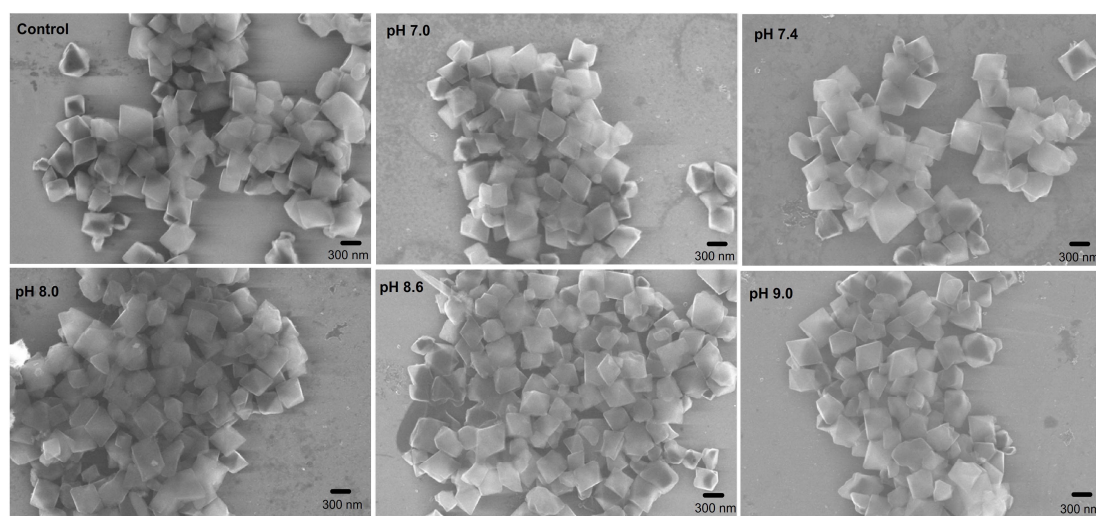

**Fig. S3** The SEM images of MIL-101 after being soaked in different pH values of Tris-HCl buffer solution over 1 h.

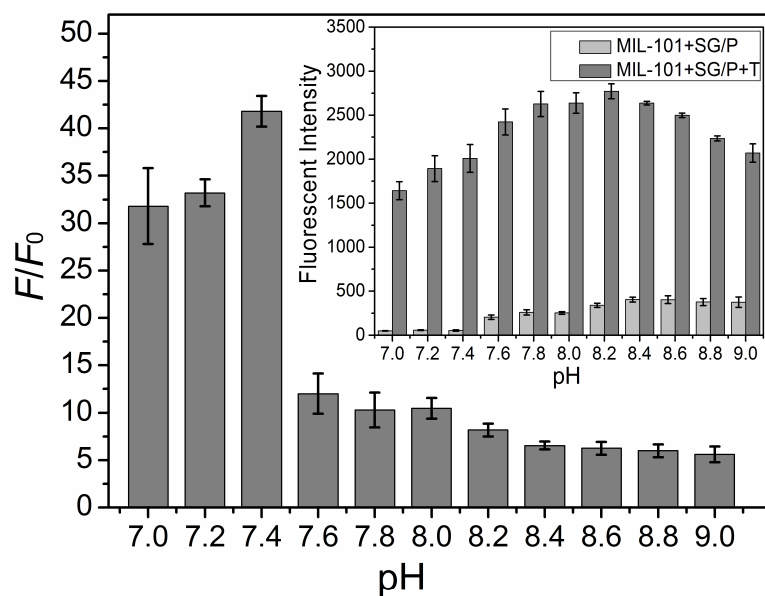

**Fig. S4** The signal-to-background ratio ( $F/F_0$ ) at different pH values of Tris-HCl buffer. Inset: Fluorescence intensity of SG at different pH values of Tris-HCl buffer. Key: light gray columns, without T; dark gray columns, 10 nM T. Concentrations: P, 20 nM; SG, 0.245  $\mu\text{M}$ ; MIL-101, 48  $\mu\text{g mL}^{-1}$ .

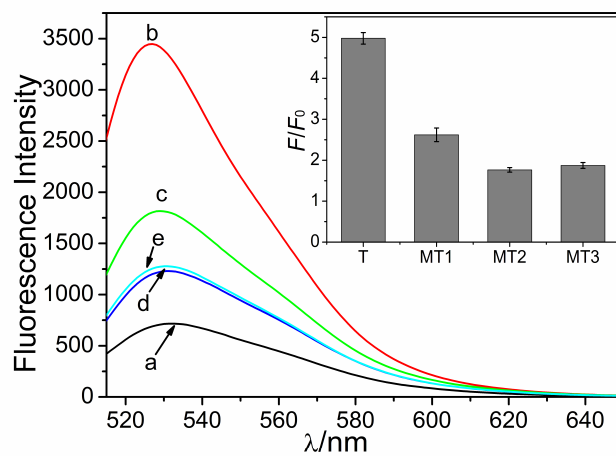

**Fig. S5** Fluorescence emission spectra of SG/P under different conditions: (a) SG/P; (b) SG/P + 10 nM T; (c) SG/P + 10 nM MT1; (d) SG/P + 10 nM MT2; (e) SG/P + 10 nM MT3. Inset: the signal-to-background ratio ( $F/F_0$ ) histogram. Concentrations: SG, 0.245  $\mu$ M; P, 20 nM. Tris-HCl buffer, pH 7.4.

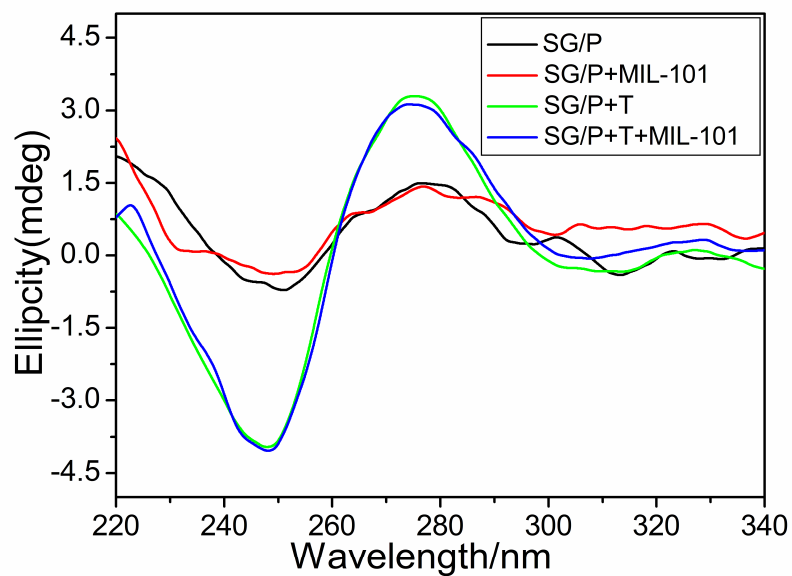

**Fig. S6** Circular dichroism of P in the absence and presence of T, MIL-101, respectively.

Concentrations: P, 1.2  $\mu\text{M}$ ; T, 1.2  $\mu\text{M}$ ; SG, 0.245  $\mu\text{M}$ ; MIL-101, 48  $\mu\text{g mL}^{-1}$ . Tris-HCl, pH 7.4.
